# Supplementary material for: A clustering approach for detecting implausible observation values in electronic health records data
Source: Springer Nature journal article supplement (doi:10.1186/s12911-019-0852-6), 2019-07-23

# Appendix

Data distribution and implausible value detection for a set of selected EHR observation types.

\* x-axes are transformed to square root for visualization purpose.

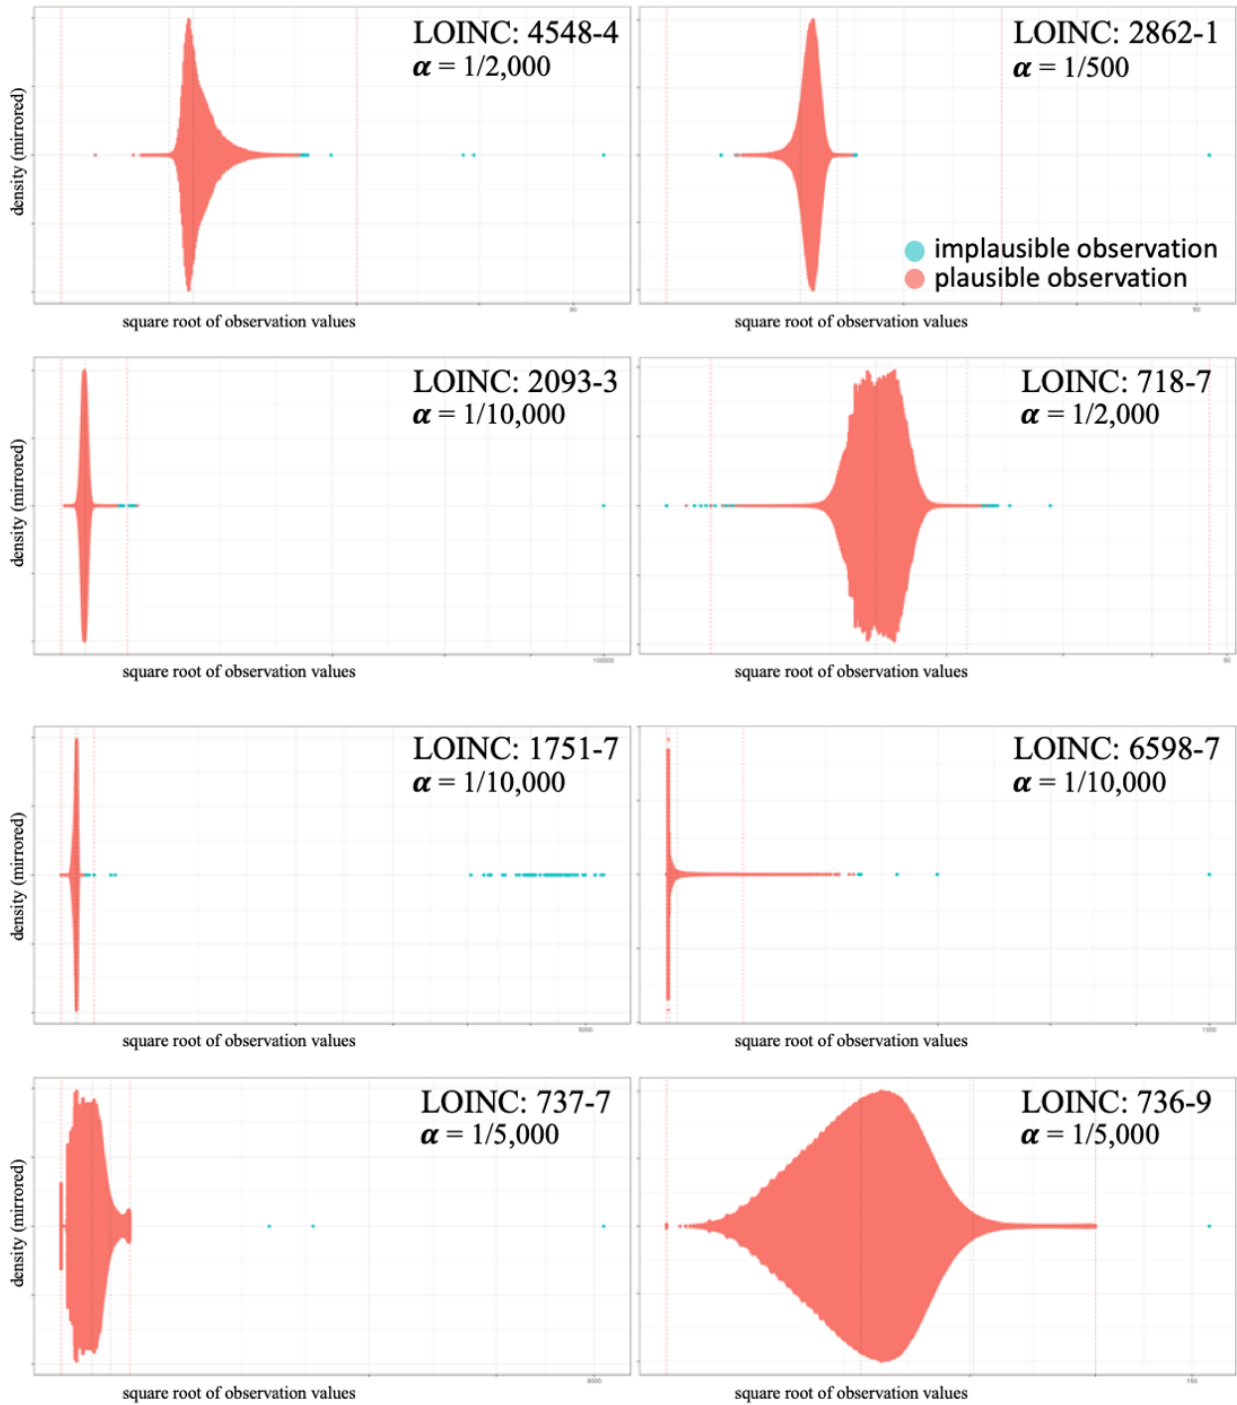

Supplement: MOESM1 [file 16973836]
